# Supplementary material
Source: MDPI journal article supplement (https://www.mdpi.com/1996-1073/16/18/6722)
Supplement: s1 [file s1]

# Supplementary file of the manuscript: Evaluation and Prioritization of Power-Generating Systems Using a Life Cycle Assessment and a Multicriteria Decision-Making Approach

Busola D. Akintayo <sup>1,\*</sup>, Oluwafemi E. Ige <sup>1</sup>, Olubayo M. Babatunde <sup>2</sup> and Oludolapo A. Olanrewaju <sup>1</sup>

<sup>1</sup> Department of Industrial Engineering, Durban University of Technology, Durban 4001, South Africa; phemmyigoh@yahoo.com (O.E.I.); oludolapoo@dut.ac.za (O.A.O.)

<sup>2</sup> Department of Electrical Electronics Engineering, University of Lagos, Akoka, Lagos 100213, Nigeria; mobabatunde@unilag.edu.ng

\* Correspondence: olaginjubusola52@gmail.com

## Contents

|                        |   |
|------------------------|---|
| Supplement Tables..... | 1 |
| Table S1.....          | 2 |
| Table S2.....          | 4 |
| Table S3.....          | 4 |
| Table S4.....          | 5 |
| Table S5.....          | 5 |
| Table S6.....          | 6 |
| Table S7.....          | 6 |
| Table S8.....          | 7 |
| Table S9.....          | 8 |

Table S1: impact categories of the energy systems

| Impact category                         | Unit                    | Geothermal power plant, 100MW | Hard coal power plant, 100MW | Gas power plant, 100MW | Nuclear power plant, 100MW | Oil power plant, 100MW | Thermal storage system, solar thermal parabolic trough, 100 MW | Wind power plant, 100MW |
|-----------------------------------------|-------------------------|-------------------------------|------------------------------|------------------------|----------------------------|------------------------|----------------------------------------------------------------|-------------------------|
| Global warming                          | kg CO <sub>2</sub> eq   | 6,99E+09                      | 37754853                     | 6219209                | 7,21E+07                   | 3,20E+07               | 70824160                                                       | 40488545                |
| Stratospheric ozone depletion           | kg CFC11 eq             | 2,31E+03                      | 1,162,388                    | 2,564,939              | 2,77E+01                   | 1,10E+01               | 252,939                                                        | 258,806                 |
| Ionizing radiation                      | kBq Co-60 eq            | 8,40E+08                      | 1497205                      | 268138,1               | 4,93E+06                   | 1,09E+06               | 1371305                                                        | 1970741                 |
| Ozone formation, Human health           | kg NO <sub>x</sub> eq   | 1,66E+07                      | 125136,7                     | 29515,12               | 2,14E+05                   | 1,37E+05               | 206489,8                                                       | 95094,85                |
| Fine particulate matter formation       | kg PM <sub>2.5</sub> eq | 1,30E+07                      | 69499,21                     | 14675,68               | 1,63E+05                   | 6,67E+04               | 154442,4                                                       | 87549,95                |
| Ozone formation, Terrestrial ecosystems | kg NO <sub>x</sub> eq   | 1,69E+07                      | 129615,6                     | 30174,11               | 2,17E+05                   | 1,41E+05               | 210524                                                         | 97855                   |
| Terrestrial acidification               | kg SO <sub>2</sub> eq   | 2,26E+07                      | 131003                       | 32919,9                | 2,70E+05                   | 1,34E+05               | 249889,2                                                       | 142371,5                |
| Freshwater eutrophication               | kg P eq                 | 3,01E+06                      | 18983,74                     | 4,677,372              | 3,22E+04                   | 1,55E+04               | 18312,34                                                       | 13143,34                |
| Marine eutrophication                   | kg N eq                 | 2,46E+05                      | 1,593,349                    | 2,383,919              | 2,37E+03                   | 1,14E+03               | 1429,14                                                        | 5656,58                 |
| Terrestrial ecotoxicity                 | kg 1,4-DCB              | 7,37E+09                      | 1,42E+08                     | 30872871               | 4,15E+08                   | 1,24E+08               | 1,75E+08                                                       | 4,38E+08                |
| Freshwater ecotoxicity                  | kg 1,4-DCB              | 2,58E+08                      | 7692497                      | 2875959                | 8,06E+06                   | 6,92E+06               | 4226064                                                        | 13944435                |
| Marine ecotoxicity                      | kg 1,4-DCB              | 3,49E+08                      | 9920477                      | 3601791                | 1,04E+07                   | 8,84E+06               | 5441618                                                        | 17220655                |
| Human carcinogenic toxicity             | kg 1,4-DCB              | 2,19E+09                      | 43246773                     | 2405892                | 3,71E+07                   | 2,72E+07               | 18133928                                                       | 36768005                |
| Human non-                              | kg 1,4-DCB              | 6,82E+09                      | 96800271                     | 36850108               | 1,22E+08                   | 9,08E+07               | 50784352                                                       | 71082150                |

|                           |             |          |          |          |          |          |          |          |
|---------------------------|-------------|----------|----------|----------|----------|----------|----------|----------|
| carcinogenic toxicity     |             |          |          |          |          |          |          |          |
| Land use                  | m2a crop eq | 3,87E+08 | 3445135  | 1376414  | 6,72E+06 | 2,97E+06 | 26058452 | 2463657  |
| Mineral resource scarcity | kg Cu eq    | 4,09E+07 | 1062719  | 175255,7 | 1,56E+06 | 7,86E+05 | 12172944 | 1569013  |
| Fossil resource scarcity  | kg oil eq   | 1,67E+09 | 8217430  | 1592464  | 1,73E+07 | 7,19E+06 | 16923978 | 10750605 |
| Water consumption         | m3          | 5,88E+07 | 364686,6 | 52945,41 | 6,05E+05 | 2,47E+05 | 353528   | 666768   |

Table S2: Decision matrix

|    | C1      | C2      | C3      | C4      | C5      | C6      | C7      | C8      | C9      | C10     | C11     | C12     | C13     | C14     | C15     | C16     | C17     | C18     |
|----|---------|---------|---------|---------|---------|---------|---------|---------|---------|---------|---------|---------|---------|---------|---------|---------|---------|---------|
| A1 | 7.0E+09 | 2.3E+03 | 8.4E+08 | 1.7E+07 | 1.3E+07 | 1.7E+07 | 2.3E+07 | 3.0E+06 | 2.5E+05 | 7.4E+09 | 2.6E+08 | 3.5E+08 | 2.2E+09 | 6.8E+09 | 3.9E+08 | 4.1E+07 | 1.7E+09 | 5.9E+07 |
| A2 | 3.8E+07 | 1.2E+01 | 1.5E+06 | 1.3E+05 | 6.9E+04 | 1.3E+05 | 1.3E+05 | 1.9E+04 | 1.6E+03 | 1.4E+08 | 7.7E+06 | 9.9E+06 | 4.3E+07 | 9.7E+07 | 3.4E+06 | 1.1E+06 | 8.2E+06 | 3.6E+05 |
| A3 | 6.2E+06 | 2.6E+00 | 2.7E+05 | 3.0E+04 | 1.5E+04 | 3.0E+04 | 3.3E+04 | 4.7E+03 | 2.4E+02 | 3.1E+07 | 2.9E+06 | 3.6E+06 | 2.4E+06 | 3.7E+07 | 1.4E+06 | 1.8E+05 | 1.6E+06 | 5.3E+04 |
| A4 | 7.2E+07 | 2.8E+01 | 4.9E+06 | 2.1E+05 | 1.6E+05 | 2.2E+05 | 2.7E+05 | 3.2E+04 | 2.4E+03 | 4.2E+08 | 8.1E+06 | 1.0E+07 | 3.7E+07 | 1.2E+08 | 6.7E+06 | 1.6E+06 | 1.7E+07 | 6.1E+05 |
| A5 | 3.2E+07 | 1.1E+01 | 1.1E+06 | 1.4E+05 | 6.7E+04 | 1.4E+05 | 1.3E+05 | 1.6E+04 | 1.1E+03 | 1.2E+08 | 6.9E+06 | 8.8E+06 | 2.7E+07 | 9.1E+07 | 3.0E+06 | 7.9E+05 | 7.2E+06 | 2.5E+05 |
| A6 | 7.1E+07 | 2.5E+01 | 1.4E+06 | 2.1E+05 | 1.5E+05 | 2.1E+05 | 2.5E+05 | 1.8E+04 | 1.4E+03 | 1.8E+08 | 4.2E+06 | 5.4E+06 | 1.8E+07 | 5.1E+07 | 2.6E+07 | 1.2E+07 | 1.7E+07 | 3.5E+05 |
| A7 | 4.0E+07 | 2.6E+01 | 2.0E+06 | 9.5E+04 | 8.8E+04 | 9.8E+04 | 1.4E+05 | 1.3E+04 | 5.7E+03 | 4.4E+08 | 1.4E+07 | 1.7E+07 | 3.7E+07 | 7.1E+07 | 2.5E+06 | 1.6E+06 | 1.1E+07 | 6.7E+05 |
| Wj | 5.0E-02 | 5.6E-02 |

\*geothermal power plant (A1), Hard coal power plant (A2), Gas power plant (A3), Nuclear power plant (A4), Oil power plant(A5), solar thermal (A6), Wind power plant (A7),

\*\*Global warming (C1),Stratospheric ozone depletion (C2), Ionizing radiation (C3), Ozone formation Human health (C4), Fine particulate matter formation (C5), Ozone formation Terrestrial ecosystems (C6), Terrestrial acidification (C7), Freshwater eutrophication (C8), Marine eutrophication (C9), Terrestrial ecotoxicity (C10), Freshwater ecotoxicity (C11), Marine ecotoxicity (C12), Human carcinogenic toxicity (C13), Human non-carcinogenic toxicity (C14), Land use (C15), Mineral resource scarcity (C16), Fossil resource scarcity (C17), Water consumption (C18)

Wj-Weight from the entropy method

Table S3: Normalized decision matrix for COPRAS

|    | C1     | C2     | C3     | C4     | C5     | C6     | C7     | C8     | C9     | C10    | C11    | C12    | C13    | C14    | C15    | C16    | C17    | C18    |
|----|--------|--------|--------|--------|--------|--------|--------|--------|--------|--------|--------|--------|--------|--------|--------|--------|--------|--------|
| A1 | 0.9642 | 0.9569 | 0.9869 | 0.9536 | 0.9590 | 0.9534 | 0.9592 | 0.9670 | 0.9519 | 0.8476 | 0.8551 | 0.8630 | 0.9300 | 0.9357 | 0.8999 | 0.7024 | 0.9642 | 0.9625 |
| A2 | 0.0052 | 0.0048 | 0.0018 | 0.0072 | 0.0051 | 0.0073 | 0.0056 | 0.0061 | 0.0062 | 0.0163 | 0.0255 | 0.0245 | 0.0184 | 0.0133 | 0.0080 | 0.0183 | 0.0047 | 0.0060 |
| A3 | 0.0009 | 0.0011 | 0.0003 | 0.0017 | 0.0011 | 0.0017 | 0.0014 | 0.0015 | 0.0009 | 0.0036 | 0.0095 | 0.0089 | 0.0010 | 0.0051 | 0.0032 | 0.0030 | 0.0009 | 0.0009 |
| A4 | 0.0099 | 0.0115 | 0.0058 | 0.0123 | 0.0120 | 0.0122 | 0.0115 | 0.0103 | 0.0092 | 0.0477 | 0.0267 | 0.0257 | 0.0158 | 0.0167 | 0.0156 | 0.0268 | 0.0100 | 0.0099 |
| A5 | 0.0044 | 0.0046 | 0.0013 | 0.0079 | 0.0049 | 0.0080 | 0.0057 | 0.0050 | 0.0044 | 0.0143 | 0.0229 | 0.0219 | 0.0116 | 0.0125 | 0.0069 | 0.0135 | 0.0042 | 0.0040 |
| A6 | 0.0098 | 0.0105 | 0.0016 | 0.0119 | 0.0114 | 0.0119 | 0.0106 | 0.0059 | 0.0055 | 0.0201 | 0.0140 | 0.0135 | 0.0077 | 0.0070 | 0.0606 | 0.2091 | 0.0098 | 0.0058 |
| A7 | 0.0056 | 0.0107 | 0.0023 | 0.0055 | 0.0065 | 0.0055 | 0.0060 | 0.0042 | 0.0219 | 0.0504 | 0.0462 | 0.0426 | 0.0156 | 0.0098 | 0.0057 | 0.0269 | 0.0062 | 0.0109 |

Table S4: Weighted Normalized Decision Matrix (COPRAS)

|    | C1     | C2     | C3     | C4     | C5     | C6     | C7     | C8     | C9     | C10    | C11    | C12    | C13    | C14    | C15    | C16    | C17    | C18    |
|----|--------|--------|--------|--------|--------|--------|--------|--------|--------|--------|--------|--------|--------|--------|--------|--------|--------|--------|
| A1 | 0.0480 | 0.0535 | 0.0552 | 0.0533 | 0.0536 | 0.0533 | 0.0536 | 0.0540 | 0.0532 | 0.0474 | 0.0478 | 0.0482 | 0.0520 | 0.0523 | 0.0503 | 0.0393 | 0.0539 | 0.0538 |
| A2 | 0.0003 | 0.0003 | 0.0001 | 0.0004 | 0.0003 | 0.0004 | 0.0003 | 0.0003 | 0.0003 | 0.0009 | 0.0014 | 0.0014 | 0.0010 | 0.0007 | 0.0004 | 0.0010 | 0.0003 | 0.0003 |
| A3 | 0.0000 | 0.0001 | 0.0000 | 0.0001 | 0.0001 | 0.0001 | 0.0001 | 0.0001 | 0.0001 | 0.0002 | 0.0005 | 0.0005 | 0.0001 | 0.0003 | 0.0002 | 0.0002 | 0.0001 | 0.0000 |
| A4 | 0.0005 | 0.0006 | 0.0003 | 0.0007 | 0.0007 | 0.0007 | 0.0006 | 0.0006 | 0.0005 | 0.0027 | 0.0015 | 0.0014 | 0.0009 | 0.0009 | 0.0009 | 0.0015 | 0.0006 | 0.0006 |
| A5 | 0.0002 | 0.0003 | 0.0001 | 0.0004 | 0.0003 | 0.0004 | 0.0003 | 0.0003 | 0.0002 | 0.0008 | 0.0013 | 0.0012 | 0.0006 | 0.0007 | 0.0004 | 0.0008 | 0.0002 | 0.0002 |
| A6 | 0.0005 | 0.0006 | 0.0001 | 0.0007 | 0.0006 | 0.0007 | 0.0006 | 0.0003 | 0.0003 | 0.0011 | 0.0008 | 0.0008 | 0.0004 | 0.0004 | 0.0034 | 0.0117 | 0.0005 | 0.0003 |
| A7 | 0.0003 | 0.0006 | 0.0001 | 0.0003 | 0.0004 | 0.0003 | 0.0003 | 0.0002 | 0.0012 | 0.0028 | 0.0026 | 0.0024 | 0.0009 | 0.0005 | 0.0003 | 0.0015 | 0.0003 | 0.0006 |

Table S5: Result of COPRAS method

| SI-         |  | S-MIN       |  | S-MIN/S-I |  | Qi       | Ui       | Rank | Alternatives            |
|-------------|--|-------------|--|-----------|--|----------|----------|------|-------------------------|
| 0.922675452 |  | 0.002599528 |  | 0.002817  |  | 0.001418 | 0.281738 | 7    | geothermal power plant, |
| 0.010264853 |  |             |  | 0.253246  |  | 0.127437 | 25.32456 | 3    | Hard coal power plant   |
| 0.002599528 |  |             |  | 1         |  | 0.503216 | 100      | 1    | Gas power plant         |
| 0.016132578 |  |             |  | 0.161135  |  | 0.081086 | 16.11353 | 5    | Nuclear power plant     |
| 0.008789804 |  |             |  | 0.295744  |  | 0.148823 | 29.57436 | 2    | Oil power plant         |
| 0.023778668 |  |             |  | 0.109322  |  | 0.055013 | 10.93219 | 6    | solar thermal           |
| 0.015759118 |  |             |  | 0.164954  |  | 0.083007 | 16.49539 | 4    | Wind power plant,       |

Table S6: Normalized decision matrix for ARAS

|    | C1     | C2     | C3     | C4     | C5     | C6     | C7     | C8     | C9     | C10    | C11    | C12    | C13    | C14    | C15    | C16    | C17    | C18    |
|----|--------|--------|--------|--------|--------|--------|--------|--------|--------|--------|--------|--------|--------|--------|--------|--------|--------|--------|
| OV | 0.3721 | 0.3639 | 0.3557 | 0.3285 | 0.3591 | 0.3290 | 0.3352 | 0.3025 | 0.3746 | 0.3582 | 0.2473 | 0.2501 | 0.4153 | 0.2305 | 0.2715 | 0.3801 | 0.3636 | 0.3735 |
| A1 | 0.0003 | 0.0004 | 0.0001 | 0.0006 | 0.0004 | 0.0006 | 0.0005 | 0.0005 | 0.0004 | 0.0015 | 0.0028 | 0.0026 | 0.0005 | 0.0012 | 0.0010 | 0.0016 | 0.0003 | 0.0003 |
| A2 | 0.0613 | 0.0803 | 0.0637 | 0.0775 | 0.0758 | 0.0766 | 0.0842 | 0.0745 | 0.0561 | 0.0779 | 0.0924 | 0.0908 | 0.0231 | 0.0878 | 0.1085 | 0.0627 | 0.0705 | 0.0542 |
| A3 | 0.3721 | 0.3639 | 0.3557 | 0.3285 | 0.3591 | 0.3290 | 0.3352 | 0.3025 | 0.3746 | 0.3582 | 0.2473 | 0.2501 | 0.4153 | 0.2305 | 0.2715 | 0.3801 | 0.3636 | 0.3735 |
| A4 | 0.0321 | 0.0337 | 0.0193 | 0.0453 | 0.0323 | 0.0458 | 0.0409 | 0.0439 | 0.0377 | 0.0266 | 0.0882 | 0.0866 | 0.0269 | 0.0696 | 0.0556 | 0.0427 | 0.0335 | 0.0327 |
| A5 | 0.0723 | 0.0849 | 0.0875 | 0.0708 | 0.0790 | 0.0704 | 0.0823 | 0.0913 | 0.0783 | 0.0892 | 0.1028 | 0.1019 | 0.0367 | 0.0936 | 0.1258 | 0.0848 | 0.0805 | 0.0801 |
| A6 | 0.0327 | 0.0369 | 0.0696 | 0.0470 | 0.0341 | 0.0472 | 0.0442 | 0.0773 | 0.0625 | 0.0632 | 0.1683 | 0.1655 | 0.0551 | 0.1673 | 0.0143 | 0.0055 | 0.0342 | 0.0559 |
| A7 | 0.0572 | 0.0361 | 0.0484 | 0.1020 | 0.0602 | 0.1015 | 0.0775 | 0.1076 | 0.0158 | 0.0252 | 0.0510 | 0.0523 | 0.0272 | 0.1195 | 0.1517 | 0.0425 | 0.0539 | 0.0297 |

OV-Optimal Value

Table S7: Weighted Normalized Decision Matrix (ARAS)

|    | C1     | C2     | C3     | C4     | C5     | C6     | C7     | C8     | C9     | C10    | C11    | C12    | C13    | C14    | C15    | C16    | C17    | C18    |
|----|--------|--------|--------|--------|--------|--------|--------|--------|--------|--------|--------|--------|--------|--------|--------|--------|--------|--------|
| OV | 0.0185 | 0.0203 | 0.0199 | 0.0184 | 0.0201 | 0.0184 | 0.0187 | 0.0169 | 0.0209 | 0.0200 | 0.0138 | 0.0140 | 0.0232 | 0.0129 | 0.0152 | 0.0212 | 0.0203 | 0.0209 |
| A1 | 0.0000 | 0.0000 | 0.0000 | 0.0000 | 0.0000 | 0.0000 | 0.0000 | 0.0000 | 0.0000 | 0.0001 | 0.0002 | 0.0001 | 0.0000 | 0.0001 | 0.0001 | 0.0001 | 0.0000 | 0.0000 |
| A2 | 0.0031 | 0.0045 | 0.0036 | 0.0043 | 0.0042 | 0.0043 | 0.0047 | 0.0042 | 0.0031 | 0.0044 | 0.0052 | 0.0051 | 0.0013 | 0.0049 | 0.0061 | 0.0035 | 0.0039 | 0.0030 |
| A3 | 0.0185 | 0.0203 | 0.0199 | 0.0184 | 0.0201 | 0.0184 | 0.0187 | 0.0169 | 0.0209 | 0.0200 | 0.0138 | 0.0140 | 0.0232 | 0.0129 | 0.0152 | 0.0212 | 0.0203 | 0.0209 |
| A4 | 0.0016 | 0.0019 | 0.0011 | 0.0025 | 0.0018 | 0.0026 | 0.0023 | 0.0025 | 0.0021 | 0.0015 | 0.0049 | 0.0048 | 0.0015 | 0.0039 | 0.0031 | 0.0024 | 0.0019 | 0.0018 |
| A5 | 0.0036 | 0.0047 | 0.0049 | 0.0040 | 0.0044 | 0.0039 | 0.0046 | 0.0051 | 0.0044 | 0.0050 | 0.0057 | 0.0057 | 0.0021 | 0.0052 | 0.0070 | 0.0047 | 0.0045 | 0.0045 |
| A6 | 0.0016 | 0.0021 | 0.0039 | 0.0026 | 0.0019 | 0.0026 | 0.0025 | 0.0043 | 0.0035 | 0.0035 | 0.0094 | 0.0093 | 0.0031 | 0.0093 | 0.0008 | 0.0003 | 0.0019 | 0.0031 |
| A7 | 0.0028 | 0.0020 | 0.0027 | 0.0057 | 0.0034 | 0.0057 | 0.0043 | 0.0060 | 0.0009 | 0.0014 | 0.0029 | 0.0029 | 0.0015 | 0.0067 | 0.0085 | 0.0024 | 0.0030 | 0.0017 |

OV-Optimal value

Table S8: Result of ARAS method

|    | Si       |  | ki       | Energy Alternative      | Rank |
|----|----------|--|----------|-------------------------|------|
| OV | 0.333692 |  | 1        |                         |      |
| A1 | 0.000868 |  | 0.002601 | geothermal power plant, | 7    |
| A2 | 0.073286 |  | 0.219621 | Hard coal power plant   | 3    |
| A3 | 0.333692 |  | 1        | Gas power plant         | 1    |
| A4 | 0.044159 |  | 0.132334 | Nuclear power plant     | 6    |
| A5 | 0.084079 |  | 0.251966 | Oil power plant         | 2    |
| A6 | 0.06579  |  | 0.197158 | solar thermal           | 4    |
| A7 | 0.064436 |  | 0.1931   | Wind power plant,       | 5    |
|    |          |  |          |                         |      |
| So | 0.333692 |  |          |                         |      |

Table S9: Dataset used for analysis.

| Input                                                                | Wind power plant | Hard coal power plant | Nuclear power plant | Geothermal power plant | Oil power plant | Wind power plant | Solar power plant |
|----------------------------------------------------------------------|------------------|-----------------------|---------------------|------------------------|-----------------|------------------|-------------------|
| Aluminium, cast alloy                                                |                  | 3.20e+4 kg            | 6.40e+4 kg          |                        | 9.60e+4 kg      |                  |                   |
| Aluminium scrap, new                                                 | 8.45e+2 kg       |                       |                     |                        |                 | 8.45e+2 kg       | 50 kg             |
| Aluminium, wrought alloy                                             | 8.45e+2 kg       | 6.80e+4 kg            | 1.36e+5 kg          |                        | 2.04e+5 kg      | 8.45e+2 kg       |                   |
| Cast iron                                                            | 2.64e+4 kg       |                       |                     |                        | 4.50e+5 kg      | 2.64e+4 kg       | 2.99e+4 kg        |
| Concrete, normal                                                     |                  | 1.68e+4 m3            | 2.00e+5 m3          |                        | 5.08e+4 m3      |                  | 1.73e+3 m3        |
| Control cabinet, heat and power co-generation unit, 160kW electrical |                  |                       |                     |                        |                 |                  | 3 units           |
| Copper, cathode                                                      | 1.59e+3 kg       | 1.50e+5 kg            | 1.47e+6 kg          |                        | 7.50e+5 kg      | 1.59e+3 kg       | 9.83e+3 kg        |
| Deep well, drilled, for geothermal power                             |                  |                       |                     | 3.20e+4 m              |                 |                  |                   |
| Diesel, burned in building machine                                   |                  | 2.16e+7 MJ            | 1.90e+8 MJ          |                        | 2.70e+8 MJ      |                  |                   |
| Diesel, burned in diesel-electric generating set, 18.5kW             |                  |                       |                     |                        |                 |                  | 1.13e+7 MJ        |
| Drawing of pipe, steel                                               |                  |                       |                     |                        |                 |                  | 2.22e+5 kg        |
| Electricity, medium voltage                                          | 6.75e+4 kWh      | 1.35e+6 kWh           | 5.31e+8 kWh         |                        | 5.62e+6 kWh     | 6.75e+4 kWh      |                   |
| Excavation, hydraulic digger                                         |                  |                       | 1.26e+5 m3          |                        |                 |                  | 4.07e+3 m3        |
| Expanded perlite                                                     |                  |                       |                     |                        |                 |                  | 5.59e+5 kg        |
| Extrusion, plastic pipes                                             |                  |                       |                     |                        |                 |                  | 18 kg             |
| Foam glass                                                           |                  |                       |                     |                        |                 |                  | 1.22e+5 kg        |
| Fibre cement facing tile                                             |                  |                       | 5.30e+6 kg          |                        |                 |                  |                   |
| Glass fibre                                                          |                  |                       |                     |                        |                 |                  | 9kg               |
| Glass fibre reinforced plastic, polyamide, injection moulded         | 4.10e+4 kg       |                       |                     |                        |                 | 4.10e+4 kg       |                   |
| Heat, district or industrial, other than natural gas                 |                  | 2.16e+7 MJ            | 1.65e+8 MJ          |                        | 2.56e+8 MJ      |                  |                   |



|                                                   |            |                 |                 |                 |                 |            |            |
|---------------------------------------------------|------------|-----------------|-----------------|-----------------|-----------------|------------|------------|
| Heat and power co-generation unit, 1MWel, 6.4MWth |            |                 |                 | 5.05 unit       |                 |            |            |
| Inert waste, for final disposal                   |            |                 | 3.79e+8 kg      | 2.23e+5 kg      |                 |            |            |
| Injection moulding                                |            |                 |                 |                 |                 |            | 8 kg       |
| Iron-nickel-chromium alloy                        |            |                 |                 |                 |                 |            | 4.18e+4 kg |
| Lead                                              | 0.5 kg     |                 |                 |                 |                 | 0.5 kg     |            |
| Lubricating oil                                   | 1.15e+3 kg |                 | 2.00e+5 kg      |                 | 6.00e+4 kg      | 1.15e+3 kg |            |
| Nitrate salts, for solar power application        |            |                 |                 |                 |                 |            | 2.96e+7 kg |
| Occupation, construction site                     |            | 5.00e+4 m2*year | 3.61e+6 m2*year |                 |                 |            |            |
| Occupation, industrial area                       |            | 4.40e+5 m2*year | 7.60e+6 m2*year | 2.40e+5 m2*year | 3.75e+6 m2*year |            |            |
| Occupation, traffic area, road network            |            | 2.07e+5 m2*year |                 |                 |                 |            |            |
| Paper, woodfree, coated                           |            |                 | 4.25e+6 kg      |                 |                 |            |            |
| Particleboard, cement bonded                      |            |                 |                 |                 |                 |            | 1 m3       |
| Plywood                                           |            |                 | 8.00e+3 m3      |                 |                 |            |            |
| Polyethylene, high density, granulate             | 27 kg      | 1.50e+5 kg      |                 |                 | 3.00e+5 kg      | 27kg       | 18 kg      |
| Polyvinylchloride, bulk polymerised               | 6 kg       |                 |                 |                 |                 | 6kg        |            |
| Polystyrene, high impact                          |            |                 |                 |                 |                 |            | 8kg        |
| Refractory, basic, packed                         |            |                 |                 |                 |                 |            | 4.09e+5 kg |
| Reinforcing steel                                 |            | 1.10e+7 kg      | 4.00e+7 kg      |                 | 3.30e+7 kg      |            | 2.56e+6 kg |
| Sand                                              |            |                 |                 |                 |                 |            | 9.40e+4 kg |
| Scrap copper                                      | 1.59e+3 kg |                 |                 |                 |                 | 1.59e+3 kg |            |
| Scrap steel                                       | 9.39e+4 kg |                 |                 |                 |                 | 9.39e+4 kg |            |
| Section bar rolling, steel                        | 4.23e+4 kg |                 |                 |                 |                 | 4.23e+4 kg |            |
| Sheet rolling, aluminium                          | 8.45e+2 kg |                 |                 |                 |                 | 8.45e+2 kg | 50 kg      |

|                                                     |            |            |            |            |            |            |            |
|-----------------------------------------------------|------------|------------|------------|------------|------------|------------|------------|
| Sheet rolling, chromium steel                       | 5.16e+4 kg |            |            |            |            | 5.16e+4 kg | 51 kg      |
| Sheet rolling, steel                                |            |            |            |            |            |            | 2.87e+2 kg |
| Silicone product                                    |            |            |            |            |            |            | 7.18e+3 kg |
| Steel, chromium steel 18/8, hot rolled              | 5.16e+4 kg | 1.00e+5 kg | 2.06e+7 kg |            | 7.50e+5 kg | 5.16e+4 kg | 5.73e+4 kg |
| Steel, low-alloyed, hot rolled                      | 1.59e+4 kg | 9.00e+5 kg | 5.57e+6 kg | 2.23e+5 kg | 2.25e+6 kg | 1.59e+4 kg | 2.83e+4 kg |
| Stimulation, deep well                              |            |            |            | 4.00e+4 m3 |            |            |            |
| Stone wool                                          |            | 1.00e+5 kg |            |            | 3.00e+5 kg |            | 1.40e+5 kg |
| Synthetic rubber                                    | 100 kg     |            |            |            |            | 100kg      | 3 kg       |
| Tap water                                           |            |            |            |            |            |            | 1.05e+5 kg |
| Tin                                                 | 0.5 kg     |            |            |            |            |            |            |
| Tin plated chromium steel sheet, 2 mm               |            |            |            |            |            |            | 100 m2     |
| Transformation, from industrial area                |            |            | 1.90e+5 m2 |            |            |            |            |
| Transformation, from pasture, man made              |            |            | 3.04e+4 m2 |            |            |            |            |
| Transformation, from unspecified                    |            | 2.50e+4 m2 | 1.60e+5 m2 |            | 1.25e+5 m2 |            |            |
| Transformation, from unspecified, natural (non-use) |            |            |            | 8.00e+3 m2 |            |            |            |
| Transformation, to industrial area                  |            | 1.70e+4 m2 | 1.90e+5 m2 | 8.00e+3 m2 | 1.25e+5 m2 |            |            |
| Transformation, to unspecified                      |            |            | 1.90e+5 m2 |            |            |            |            |
| Transformation, to traffic area, road network       |            | 8.00e+3 m2 |            |            |            |            |            |
| Transformer, high voltage use                       |            |            |            |            |            |            | 1.74e+4 kg |
| Waste cement in concrete and mortar                 |            |            |            |            | 1.12e+8 kg |            |            |
| Waste glass                                         | 2.66e+4 kg |            |            |            |            | 2.66e+4 kg |            |
| Waste mineral oil                                   | 1.15e+3 kg |            |            |            | 6.00e+4 kg | 1.15e+3 kg |            |

|                                          |            |            |  |  |            |            |            |
|------------------------------------------|------------|------------|--|--|------------|------------|------------|
| Waste mineral wool                       |            | 1.00e+5 kg |  |  | 3.00e+5 kg |            |            |
| Waste plastic, mixture                   | 1.44e+4 kg |            |  |  |            | 1.44e+4 kg |            |
| Waste polyethylene/polypropylene product | 27 kg      | 1.50e+5 kg |  |  | 3.00e+5 kg | 27 kg      |            |
| Waste polyvinylchloride                  | 6 kg       |            |  |  |            | 6 kg       |            |
| Waste reinforced concrete                |            | 4.20e+7 kg |  |  |            |            |            |
| Welding, arc, steel                      |            |            |  |  |            |            |            |
| Wire drawing, copper                     | 1.59e+3 kg |            |  |  |            | 1.59e+3 kg | 9.83e+3 kg |
| Scrap copper                             | 1.59e+3 kg |            |  |  |            | 1.59e+3 kg |            |
